# Supplementary material for: Altered Expression of Candidate Genes in Mayer–Rokitansky–Küster–Hauser Syndrome May Influence Vaginal Keratinocytes Biology: A Focus on Protein Kinase X
Source: MDPI journal article supplement (doi:10.3390/biology10060450), 2021-05-21
Supplement: s1 [file s1]

Merges (hybridization + standard) of uncropped blots showed in the final manuscript. Protein lysates from the same experiment were run in different lanes and probed with specific antibodies.

Western blot analysis of PRKX and Actin expression in H1299 cells. The top panel shows PRKX (41 kDa) expression, with a band at approximately 37 kDa. The bottom panel shows Actin (42 kDa) expression, with a band at approximately 42 kDa. Molecular weight markers are indicated on the left of each panel.

Western blot analysis of PRKX and Actin. The top panel shows PRKX (41 kDa) bands in lanes 1-2, with molecular weight markers at 25, 20, 15, and 10 kDa. The bottom panel shows Actin (42 kDa) bands in lanes 1-2, with molecular weight markers at 50 kDa and 37 kDa. Both panels indicate that lanes 1-2 are samples of the figure.

| Pecis | Prote | Dual |         |                                                                                                        |                                                              |
|-------|-------|------|---------|--------------------------------------------------------------------------------------------------------|--------------------------------------------------------------|
|       |       |      | 10% gel | 50 kDa -<br>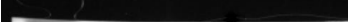 37 kDa - | <b>PRKX (41 kDa)</b> lanes 3-4<br>are samples of the figure  |
|       |       |      | 10% gel | 50 kDa -<br> 37 kDa - | <b>Actin (42 kDa)</b> lanes 3-4<br>are samples of the figure |

|         |                        |                                                                                     |                                            |
|---------|------------------------|-------------------------------------------------------------------------------------|--------------------------------------------|
| 10% gel | 37 kDa -               | 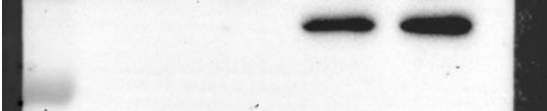 | <b>PRKX (41 kDa)</b>                       |
| 15% gel | 100 kDa -<br>75 kDa -  |  | <b><math>\beta</math>-Catenin (90 kDa)</b> |
| 15% gel | 25 kDa -               |  | <b>TWIST (25 kDa)</b>                      |
| 15% gel | 37 kDa -<br>25 kDa -   |  | <b>SLUG (35 kDa)</b>                       |
| 10% gel | 150 kDa -<br>100 kDa - |  | <b>E-Cadherin (110 kDa)</b>                |
| 10% gel | 50 kDa -               |  | <b>Actin (42 kDa)</b>                      |
